# Supplementary material for: Identification of key active residues and solution conditions that affect peptide-catalyzed ester hydrolysis
Source: Royal Society of Chemistry journal article supplement (doi:10.1039/d4nj00977k), 2024-01-01
Supplement: d4nj00977k1.pdf [file d4nj00977k1.pdf]

Electronic Supplementary Information For:

# Identification of Key Active Residues and Solution Conditions that Affect Peptide-Catalyzed Ester Hydrolysis

*Kyle B. Meerbott<sup>a</sup> and Marc R. Knecht,<sup>a,b,\*</sup>*

<sup>a</sup>Department of Chemistry, University of Miami, 1301 Memorial Drive, Coral Gables, Florida 33146, United States,

<sup>b</sup>Dr. J.T. Macdonald Foundation Biomedical Nanotechnology Institute, University of Miami, UM Life Science Technology Building, 1951 NW 7th Ave, Suite 475, Miami, Florida, 33136, United States

\*To whom correspondence should be addressed: MRK: Phone: (305) 284-9351, email: [knecht@miami.edu](mailto:knecht@miami.edu)

| pH   | CPN3 ( $\times 10^{-3}$ ) | AuBP1( $\times 10^{-3}$ ) | No-Peptide ( $\times 10^{-3}$ ) |
|------|---------------------------|---------------------------|---------------------------------|
| 6.5  | 0.22 $\pm$ 0.20           | 0.26 $\pm$ 0.24           | 0.04 $\pm$ 0.12                 |
| 7    | 0.68 $\pm$ 0.14           | 0.22 $\pm$ 0.09           | 0.26 $\pm$ 0.09                 |
| 7.42 | 1.5 $\pm$ 0.007           | 0.7 $\pm$ 0.2             | 0.6 $\pm$ 0.2                   |
| 8    | 3.1 $\pm$ 0.2             | 2.0 $\pm$ 0.3             | 2.0 $\pm$ 0.3                   |

| Buffer    | Peptide ( $\times 10^{-3}$ ) | Control ( $\times 10^{-3}$ ) | Net ( $\times 10^{-3}$ ) |
|-----------|------------------------------|------------------------------|--------------------------|
| Phosphate | 3.1 $\pm$ 0.2                | 2.0 $\pm$ 0.3                | 1.1 $\pm$ 0.4            |
| Tris      | 2.5 $\pm$ 0.3                | 1.4 $\pm$ 0.1                | 1.1 $\pm$ 0.3            |
| HEPES     | 2.8 $\pm$ 0.1                | 1.8 $\pm$ 0.1                | 1.0 $\pm$ 0.1            |
| MOPS      | 2.7 $\pm$ 0.2                | 1.7 $\pm$ 0.2                | 1.0 $\pm$ 0.3            |

| Substrate       | $k$ ( $\times 10^{-3}$ ) | Control ( $\times 10^{-3}$ ) | Net $k$ ( $\times 10^{-3}$ ) |
|-----------------|--------------------------|------------------------------|------------------------------|
| 4-pNPA          | 3.6 $\pm$ 0.1            | 2.4 $\pm$ 0.2                | 1.2 $\pm$ 0.2                |
| 4-pNPB          | 7.5 $\pm$ 0.4            | 5.7 $\pm$ 0.5                | 1.8 $\pm$ 0.6                |
| Indoxyl Acetate | 2.3 $\pm$ 0.6            | 2.4 $\pm$ 0.1                | -0.1 $\pm$ 0.6               |
| 4-pNPA_DMF      | 1.5 $\pm$ 0.04           | 0.89 $\pm$ 0.07              | 0.57 $\pm$ 0.08              |
| 4-pNPP_DMF      | 0.8 $\pm$ 0.3            | 0.42 $\pm$ 0.06              | 0.4 $\pm$ 0.3                |

| Peptide      | $k$ ( $\times 10^{-3}$ ) |
|--------------|--------------------------|
| CPN3         | 3.7 $\pm$ 0.1            |
| CPN3-S4A     | 2.5 $\pm$ 0.1            |
| CPN3-T6A     | 3.5 $\pm$ 0.1            |
| CPN3-S4A,T6A | 3.1 $\pm$ 0.1            |
| CPN3-DTNB    | 1.7 $\pm$ 0.2            |
| Control-DTNB | 1.8 $\pm$ 0.1            |
| Control      | 2.2 $\pm$ 0.3            |

**Figure S1.** Various  $k$  values reported for the indicated experiment.
